# Supplementary material for: Identification of survival-associated alternative splicing events and signatures in adrenocortical carcinoma based on TCGA SpliceSeq data
Source: Aging (Albany NY). 2020 Mar 26;12(6):4996–5009. doi: 10.18632/aging.102924 (PMC7138552; doi:10.18632/aging.102924)
Supplement: Supplementary Table 1 [file aging-12-102924-s001..xlsx]

## Sheet: Sheet1
Supplementary Table 1. The list of splicing factor (SF) genes.
ACIN1
AGGF1
ALYREF
AQR
ARGLU1
BAG2
BCAS1
BCAS2
BUB3
BUD13
BUD31
C17orf85
C19orf43
SDE2
C1QBP
C9orf78
CACTIN
CCAR1
CCDC12
CCDC130
CCDC75
CCDC94
CD2BP2
CDC40
CDC5L
CDK10
CDK11A
CDK12
CELF1
CELF2
CELF3
CELF4
CELF5
CELF6
CFAP20
CHERP
CIRBP
CLASRP
CLK1
CLK2
CLK3
CLK4
CLNS1A
CPSF6
CRNKL1
CSN3
CTNNBL1
CWC15
CWC22
CWC25
CWC27
CXorf56
DDX1
DDX17
DDX18
DDX19A
DDX19B
DDX20
DDX21
DDX23
DDX26B
DDX27
DDX39A
DDX39B
DDX3X
DDX3Y
DDX41
DDX42
DDX46
DDX5
DDX50
DDX6
DGCR14
DHX15
DHX16
DHX30
DHX34
DHX35
DHX36
DHX38
DHX40
DHX57
DHX8
DHX9
DNAJC6
DNAJC8
EEF1A1
EFTUD2
EIF2S2
EIF3A
EIF4A3
ELAVL1
ELAVL2
ELAVL3
ELAVL4
FAM32A
FAM50A
FAM50B
FAM58A
FMR1
FRA10AC1
FRG1
FUBP1
FUBP3
FUS
GEMIN2
GEMIN5
GNB2L1
GPATCH1
GPATCH3
GPATCH8
GPKOW
GRSF1
HNRNPA0
HNRNPA1
HNRNPA2B1
HNRNPA3
HNRNPAB
HNRNPC
HNRNPCL1
HNRNPD
HNRNPDL
HNRNPF
HNRNPH1
HNRNPH2
HNRNPH3
HNRNPK
HNRNPL
HNRNPLL
HNRNPM
HNRNPR
HNRNPU
HNRNPUL1
HNRNPUL2
HSPA1A
HSPA1B
HSPA5
HSPA8
HSPB1
HTATSF1
IGF2BP3
IK
ILF2
ILF3
INTS1
INTS3
INTS4
INTS5
INTS6
INTS7
ISY1
JUP
KHDRBS1
KHDRBS3
KHSRP
KIAA1429
KIAA1967
KIN
LENG1
LOC649330
LSM1
LSM10
LSM2
LSM3
LSM4
LSM5
LSM6
LSM7
LSM8
LSMD1
LUC7L
LUC7L2
LUC7L3
MAGOH
MATR3
MBNL1
MBNL2
MBNL3
MFAP1
MFSD11
MOV10
MSI1
MSI2
MYEF2
NCBP1
NCBP2
NELFE
NKAP
NONO
NOSIP
NOVA1
NOVA2
NRIP2
NSRP1
NUDT21
NUMA1
PABPC1
PAXBP1
PCBP1
PCBP2
PCBP3
PCBP4
PDCD7
PHF5A
PLRG1
PNN
PPIE
PPIG
PPIH
PPIL1
PPIL2
PPIL3
PPIL4
PPM1G
PPP1CA
PPP1R8
PPWD1
PQBP1
PRCC
PRMT5
PRPF18
PRPF19
PRPF3
PRPF31
PRPF38A
PRPF38B
PRPF39
PRPF4
PRPF40A
PRPF40B
PRPF4B
PRPF6
PRPF8
PSEN1
PSIP1
PTBP1
PTBP2
PTBP3
PUF60
QKI
RALY
RALYL
RAVER1
RAVER2
RBBP6
RBFOX2
RBM10
RBM14
RBM15
RBM15B
RBM17
RBM22
RBM23
RBM25
RBM26
RBM27
RBM3
RBM39
RBM4
RBM42
RBM45
RBM47
RBM4B
RBM5
RBM7
RBM8A
RBMS1
RBMX
RBMX2
RBMXL1
RBMXL2
RNF113A
RNF20
RNF213
RNF34
RNF40
RNPC3
RNPS1
RNU1-1
RNU2-1
RNU4-1
RNU5A-1
RNU6-1
SAP18
SAP30BP
SART1
SEC31B
SF1
SF3A1
SF3A2
SF3A3
SF3B1
SF3B2
SF3B3
SF3B4
SF3B5
SF3B6
SFPQ
SKIV2L2
SLU7
SMN1
SMNDC1
SMU1
SNIP1
SNRNP200
SNRNP25
SNRNP27
SNRNP35
SNRNP40
SNRNP48
SNRNP70
SNRPA
SNRPA1
SNRPB
SNRPB2
SNRPC
SNRPD1
SNRPD2
SNRPD3
SNRPE
SNRPF
SNRPG
SNRPN
SNU13
SNURF
SNW1
SPEN
SREK1
SRPK1
SRPK2
SRPK3
SRRM1
SRRM2
SRRT
SRSF1
SRSF10
SRSF11
SRSF12
SRSF2
SRSF3
SRSF4
SRSF5
SRSF6
SRSF7
SRSF8
SRSF9
SSB
SUGP1
SYF2
SYNCRIP
TAF15
TCERG1
TFIP11
THOC1
THOC2
THOC3
THOC5
THOC6
THOC7
THRAP3
TIA1
TIAL1
TNPO1
TOE1
TOP1MT
TOPORS
TRA2A
TRA2B
TRIM24
TTC14
TXNL4A
U2AF1
U2AF1L4
U2AF2
U2SURP
UBL5
USP39
WBP11
WBP4
WDR77
WDR83
WTAP
XAB2
YBX1
YBX3
ZC3H11A
ZC3H13
ZC3H18
ZC3H4
ZC3HAV1
ZCCHC10
ZCCHC8
ZCRB1
ZFR
ZMAT2
ZMAT5
ZMYM3
ZNF131
ZNF207
ZNF326
ZNF346
ZNF830
ZRSR1
ZRSR2
